# Supplementary material for: Exploitation of an ant-plant mutualism by a cavity-nesting wasp
Source: PeerJ journal article supplement (doi:10.7717/peerj.20984), 2026-04-15
Supplement: TableS1.pdf [file TableS1.pdf]

Supplemental Table S1. Numbers of myrmecophytic *Macaranga* trees of suitable size inspected in addition to the datasets used for testing of the hypotheses, and number of trees with recorded wasp nests. All nests apart from one in *M. pearsonii* in the main study area were not distinguishable from *Dasyproctus agilis*, even though properly developed adults necessary for species identification were collected only from several trees in the main study area and from the specimen of *M. pearsonii* at the Labuk river in North Sabah. See Fig. 1 for a map of the regions and wasp records.

| Region, <i>Macaranga</i> species | Trees inspected | Trees colonised by wasps | Location of selected colonised trees |
|----------------------------------|-----------------|--------------------------|--------------------------------------|
| <b>Eastern Sabah</b>             |                 |                          |                                      |
| <i>M. sect. Pachystemon sp.</i>  | 1               | 0                        |                                      |
| <i>M. pearsonii</i>              | 2               | 0                        |                                      |
| <b>Main study area</b>           |                 |                          |                                      |
| <i>M. cf. indistincta</i>        | 9               | 2                        |                                      |
| <i>M. hypoleuca</i>              | 84              | 8                        |                                      |
| <i>M. pearsonii</i>              | 67              | 3                        |                                      |
| <i>M. winkleri</i>               | 16              | 0                        |                                      |
| <b>North Sabah</b>               |                 |                          |                                      |
| <i>M. sect. Pachystemon sp.</i>  | 11              | 0                        |                                      |
| <i>M. hypoleuca</i>              | 6               | 0                        |                                      |
| <i>M. indistincta</i>            | 3               | 0                        |                                      |
| <i>M. lamellata</i>              | 4               | 0                        |                                      |
| <i>M. motleyana</i>              | 6               | 0                        |                                      |
| <i>M. pearsonii</i>              | 3               | 1                        | 5°40'50"N, 117°05'30"E               |
| <b>Northwest Sabah</b>           |                 |                          |                                      |
| <i>M. cf. glandibracteolata</i>  | 1               | 1                        | 6°02'30"N 116°12'50"E                |
